# Supplementary material for: COI metabarcoding primer choice affects richness and recovery of indicator taxa in freshwater systems
Source: PubMed Central journal article supplement (PMC6742397; doi:10.1371/journal.pone.0220953), 2019-09-12

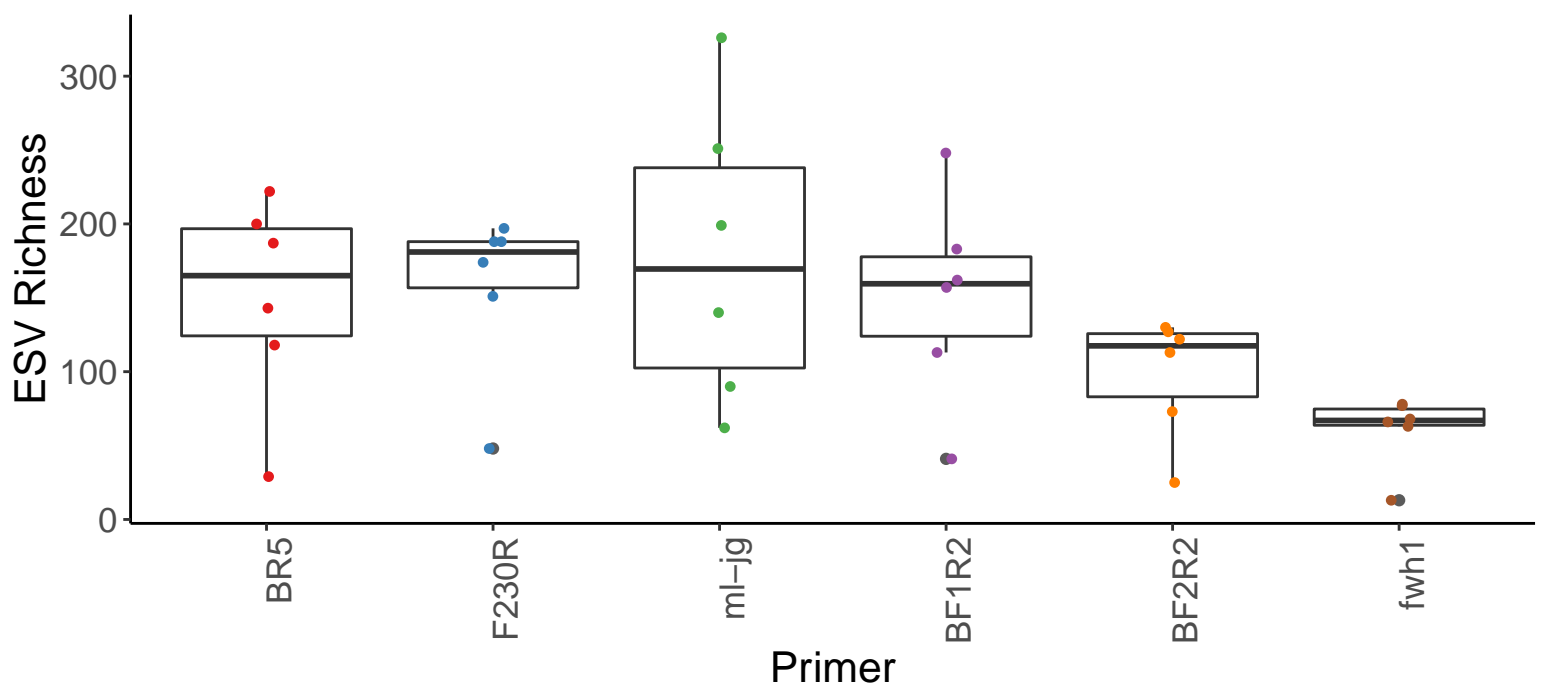

Supplement: pone.0220953.s008.pdf [file pone.0220953.s008.pdf]
